# Supplementary material for: Examining the Cross Cultural Validity and Measurement Invariance of the Emotion Beliefs Questionnaire (EBQ) in Iran and the USA
Source: Springer Nature journal article supplement (doi:10.1007/s10862-023-10068-2), 2023-06-28
Supplement: MOESM2 [file 25545500]

**پرسشنامه باور در مورد هیجانات**

این پرسشنامه از باورهای شما در مورد هیجانات به طور کلی سوال می‌کند. بعضی از سوالات در مورد هیجان‌های منفی است (مثل غم، ترس و خشم). سوالات دیگر در مورد هیجان‌های مثبت است (مثل شادی، لذت و سرگرمی). لطفاً مشخص کنید که به نظرتان هر مورد به طور کلی تا چه اندازه درست است.

|  | عبارت | کاملاً مخالفم | مخالفم | تا حدودی مخالفم | نه موافقم و نه مخالفم | تا حدودی موافقم | موافقم | کاملاً موافقم |
| --- | --- | --- | --- | --- | --- | --- | --- | --- |
| 1 | وقتی افراد هیجان‌های منفی دارند، کاری از دستشان برای تغییر آن هیجان‌ها برنمی‌آید. |  |  |  |  |  |  |  |
| 2 | افراد نمی‌توانند هیجانات مثبت خود را کنترل کنند. |  |  |  |  |  |  |  |
| 3 | هیجانات منفی فایده چندانی ندارند. |  |  |  |  |  |  |  |
| 4 | هیجانات مثبت برای افراد خیلی بی‌فایده‌اند. |  |  |  |  |  |  |  |
| 5 | افراد هر قدر هم تلاش کنند، نمی‌توانند هیجانات منفی خود را تغییر دهند. |  |  |  |  |  |  |  |
| 6 | افراد نمی‌توانند تکنیک‌هایی یاد بگیرند تا هیجانات مثبت خود را به طور موثری کنترل کنند. |  |  |  |  |  |  |  |
| 7 | افراد به هیجانات منفی خود نیاز ندارند. |  |  |  |  |  |  |  |
| 8 | هیجانات مثبت فایده چندانی ندارند. |  |  |  |  |  |  |  |
| 9 | افراد نمی‌توانند هیجانات منفی خود را کنترل کنند. |  |  |  |  |  |  |  |
| 10 | افراد هر قدر هم تلاش کنند، نمی‌توانند هیجانات مثبت خود را تغییر دهند. |  |  |  |  |  |  |  |
| 11 | هیجانات منفی، مضر هستند. |  |  |  |  |  |  |  |
| 12 | افراد به هیجانات مثبت خود نیازی ندارند. |  |  |  |  |  |  |  |
| 13 | افراد نمی‌توانند تکنیک‌هایی یاد بگیرند تا هیجانات منفی خود را به طور موثری کنترل کنند. |  |  |  |  |  |  |  |
| 14 | وقتی افراد هیجانات مثبت دارند، کاری از دستشان برای تغییر آن هیجان‌ها بر نمی‌آید. |  |  |  |  |  |  |  |
| 15 | وجود هیجانات منفی چیز بدی برای افراد است. |  |  |  |  |  |  |  |
| 16 | هیجانات مثبت مضر هستند. |  |  |  |  |  |  |  |

**راهنمای نمره‌گذاری پرسشنامه باورهای هیجانی[[1]](#footnote-1) (EBQ)**

EBQ یک مقیاس خودگزارش‌دهی از باورها در مورد هیجانات است. بر اساس چارچوب نظری فورد[[2]](#footnote-2) و گراس[[3]](#footnote-3) (2019)، EBQ دو دسته از باورها در مورد هیجانات را مورد ارزیابی قرار می‌دهد: باورهایی در مورد کنترل‌پذیری[[4]](#footnote-4) هیجانات و باورهایی در مورد سودمندی[[5]](#footnote-5) هیجانات. این باورها با توجه به هیجانات منفی (مثل غم) و هیجانات مثبت (مثل شادی) ارزیابی می‌شوند.

چهار خرده‌ مقیاس و سه نمره‌ی ترکیبی استخراج شده از این ابزار به این صورت طراحی شده‌اند که نمرات بالاتر نشان‌دهنده باورهای ناسازگارانه بیشتر در مورد هیجانات است (یعنی وجود باورهای قوی‌تر مبنی بر این‌که هیجانات غیرقابل کنترل و غیر سودمند هستند). جدول زیر هر یک از این نمرات و نحوه محاسبه آن‌ها را شرح می‌دهد.

| **خرده‌مقیاس/ ترکیب** | **روش محاسبه** | **محتوای اندازه‌گیری شده** |
| --- | --- | --- |
| **نمرات خرده مقیاس** | | |
| کنترل‌پذیری- منفی | جمع گویه‌های 1- 5- 9-13 | باورهایی در مورد این‌که هیجانات منفی، چقدر غیر قابل کنترل هستند. |
| کنترل‌پذیری- مثبت | جمع گویه‌های 2-6- 10- 14 | باورهایی در مورد اینکه هیجانات مثبت، چقدر غیر قابل کنترل هستند. |
| سودمندی- منفی | جمع گویه‌های 3- 7- 11- 15 | باورهایی در مورد اینکه هیجانات منفی، چقدر غیر سودمند (به عنوان مثال، نامطلوب، بی‌اهمیت یا مضر) هستند. |
| سودمندی- مثبت | جمع گویه‌های 4- 8- 12- 16 | باورهایی در مورد اینکه هیجانات مثبت، چقدر غیر سودمند (به عنوان مثال، نامطلوب، بی‌اهمیت یا مضر) هستند. |
| **نمرات ترکیبی** | | |
| کنترل‌پذیری- کلی | جمع خرده مقیاس‌های کنترل‌پذیری- منفی و کنترل‌پذیری- مثبت | باورهایی در مورد اینکه هیجانات منفی و مثبت، چقدر غیرقابل‌کنترل هستند. |
| سودمندی- کلی | جمع خرده مقیاس‌های سودمندی- منفی و سودمندی- مثبت | باورهایی در مورد اینکه هیجانات منفی و مثبت، چقدر غیر سودمند (به عنوان مثال، نامطلوب، بی‌اهمیت یا مضر) هستند. |
| نمره کل | جمع کل گویه‌ها | نشان‌دهنده کلی باورهای ناسازگار درباره هیجانات؛ ترکیبی از باورها در مورد اینکه هیجانات منفی و مثبت، چقدر غیرقابل‌کنترل و غیر سودمند هستند. |

1. Emotion Beliefs Questionnaire [↑](#footnote-ref-1)
2. Ford [↑](#footnote-ref-2)
3. Gross [↑](#footnote-ref-3)
4. controllability [↑](#footnote-ref-4)
5. usefulness [↑](#footnote-ref-5)
